# Supplementary material for: Flexible ferroelasticity in monolayer PdS2: a DFT study
Source: Royal Society of Chemistry journal article supplement (doi:10.1039/d0cp06287a), 2021-01-01
Supplement: d0cp06287a1.pdf [file d0cp06287a1.pdf]

Supplementary Material for

## **Flexible Ferroelasticity in Monolayer PdS<sub>2</sub>: a DFT Study**

*Wei Zhang\**, Yang Cui, Chuanhui Zhu, Biyi Huang and Shubin Yan

*College of Electrical Engineering, Zhejiang University of Water Resources and Electronic Power,  
Hangzhou 310018, People's Republic of China*

*E-mail: zhangw@zjweu.edu.cn*

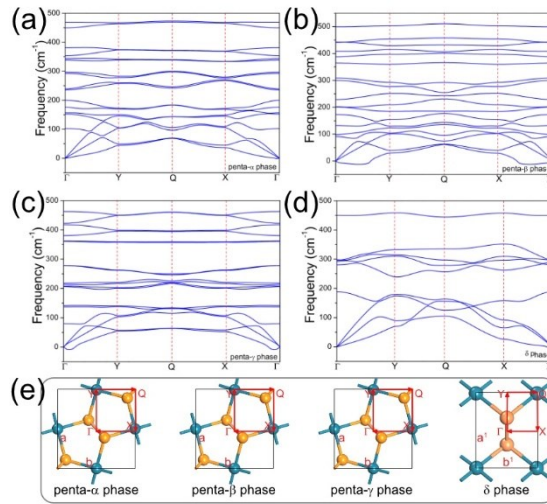

Figure s1. The phonon dispersion curves of monolayer PdS<sub>2</sub> in (a) penta- $\alpha$  phase, (b) penta- $\beta$  phase, (c) penta- $\gamma$  phase, and (d)  $\delta$  phase. (e) The integration path in Brillouin zone used for phonon dispersion calculations including high symmetry points of  $\Gamma$  (0, 0, 0), Y (0, 0.5, 0), Q (0.5, 0.5, 0) and X (0.5, 0, 0).

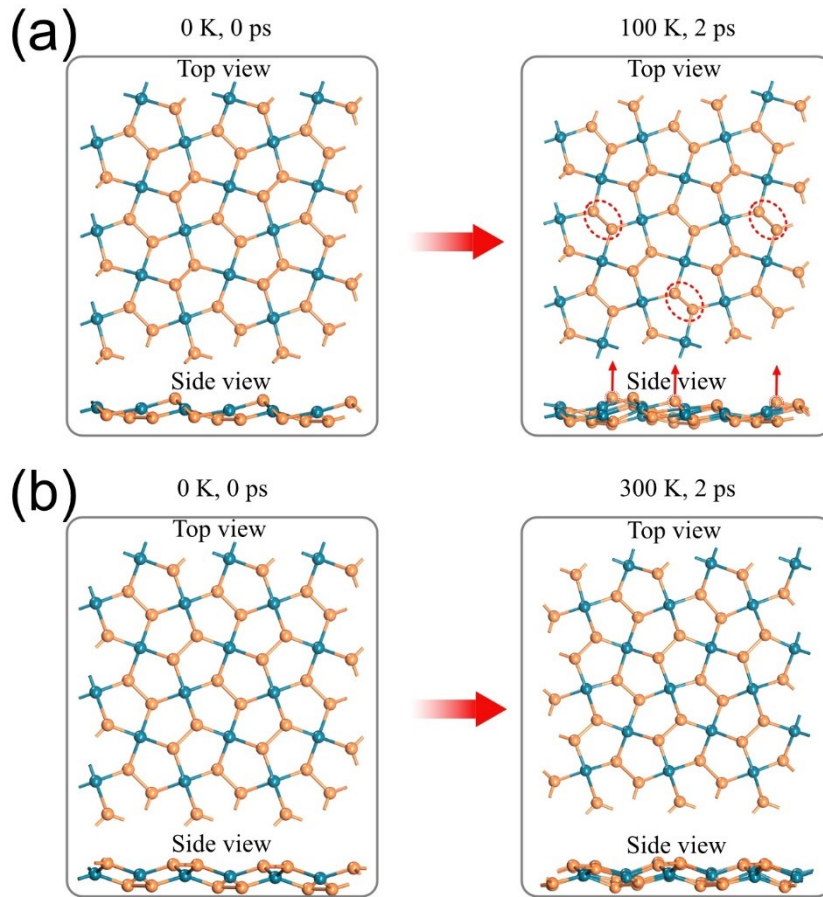

Figure s2. Top and side views of AIMD simulations for (a) penta- $\beta$  and (b) penta- $\gamma$  monolayer PdS<sub>2</sub> (supercell:  $3 \times 3 \times 1$ ).

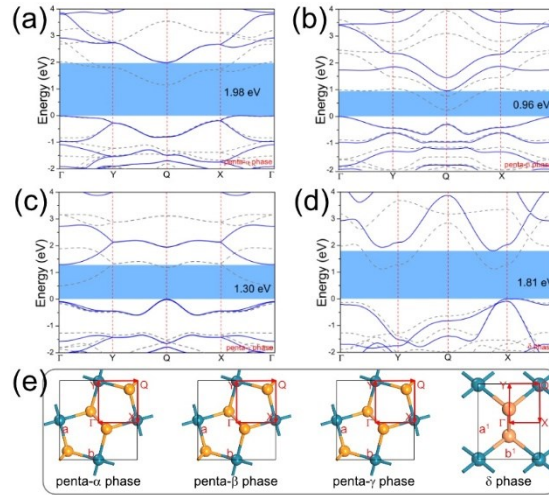

Figure s3. Calculated band structure of monolayer PdS<sub>2</sub> in (a) penta-α phase, (b) penta-β phase, (c) penta-γ phase, and (d) δ phase with PBE (grey dash lines) and HSE (blue lines) method. (e) The integration path in Brillouin zone used for electronic structure calculations, which includes high symmetry points of  $\Gamma$  (0, 0, 0), Y (0, 0.5, 0), Q (0.5, 0.5, 0) and X (0.5, 0, 0).

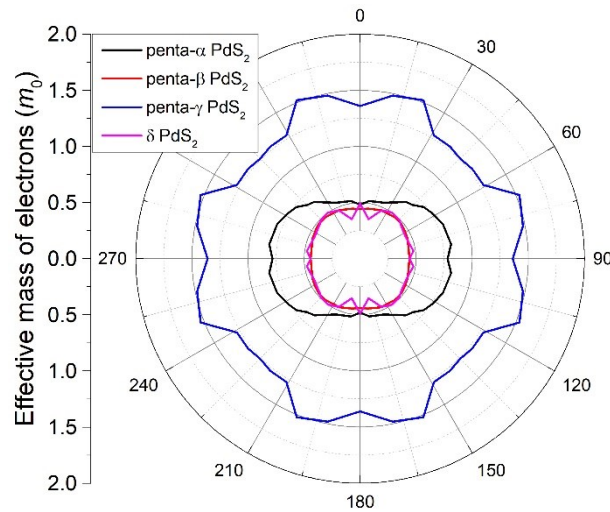

Figure s4. The effective mass of electron according to the spatial direction (0~360) for monolayer PdS<sub>2</sub> in penta-α phase, penta-β phase, penta-γ phase, and δ phase.

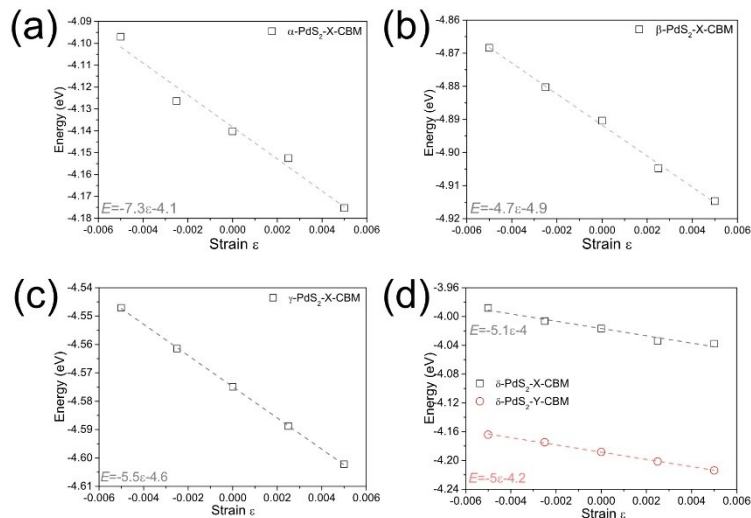

Figure s5. Energy shift of CBM for monolayer PdS<sub>2</sub> in (a) penta- $\alpha$  phase, (b) penta- $\beta$  phase, (c) penta- $\gamma$  phase, and (d)  $\delta$  phase with respect to the lattice dilation and compression along X and Y direction, respectively.

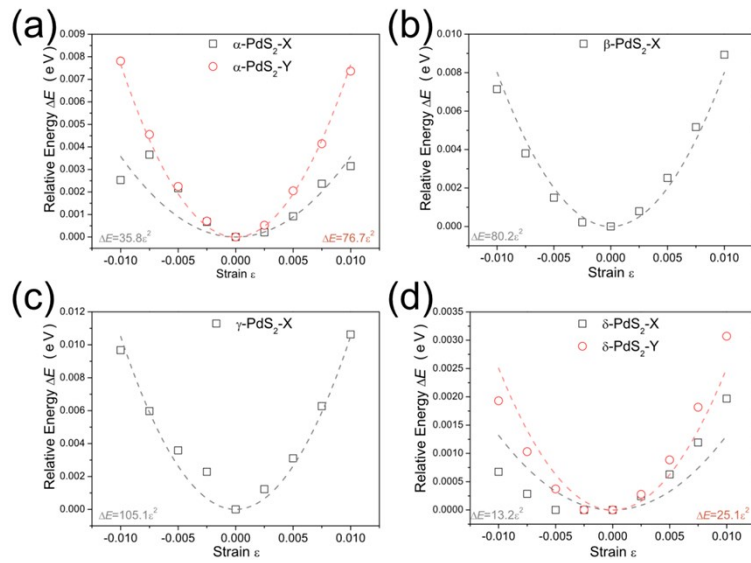

Figure s6. Energy difference between the total energy of relaxed and strained monolayer PdS<sub>2</sub> in (a) penta- $\alpha$  phase, (b) penta- $\beta$  phase, (c) penta- $\gamma$  phase, and (d)  $\delta$  phase along X and Y directions.

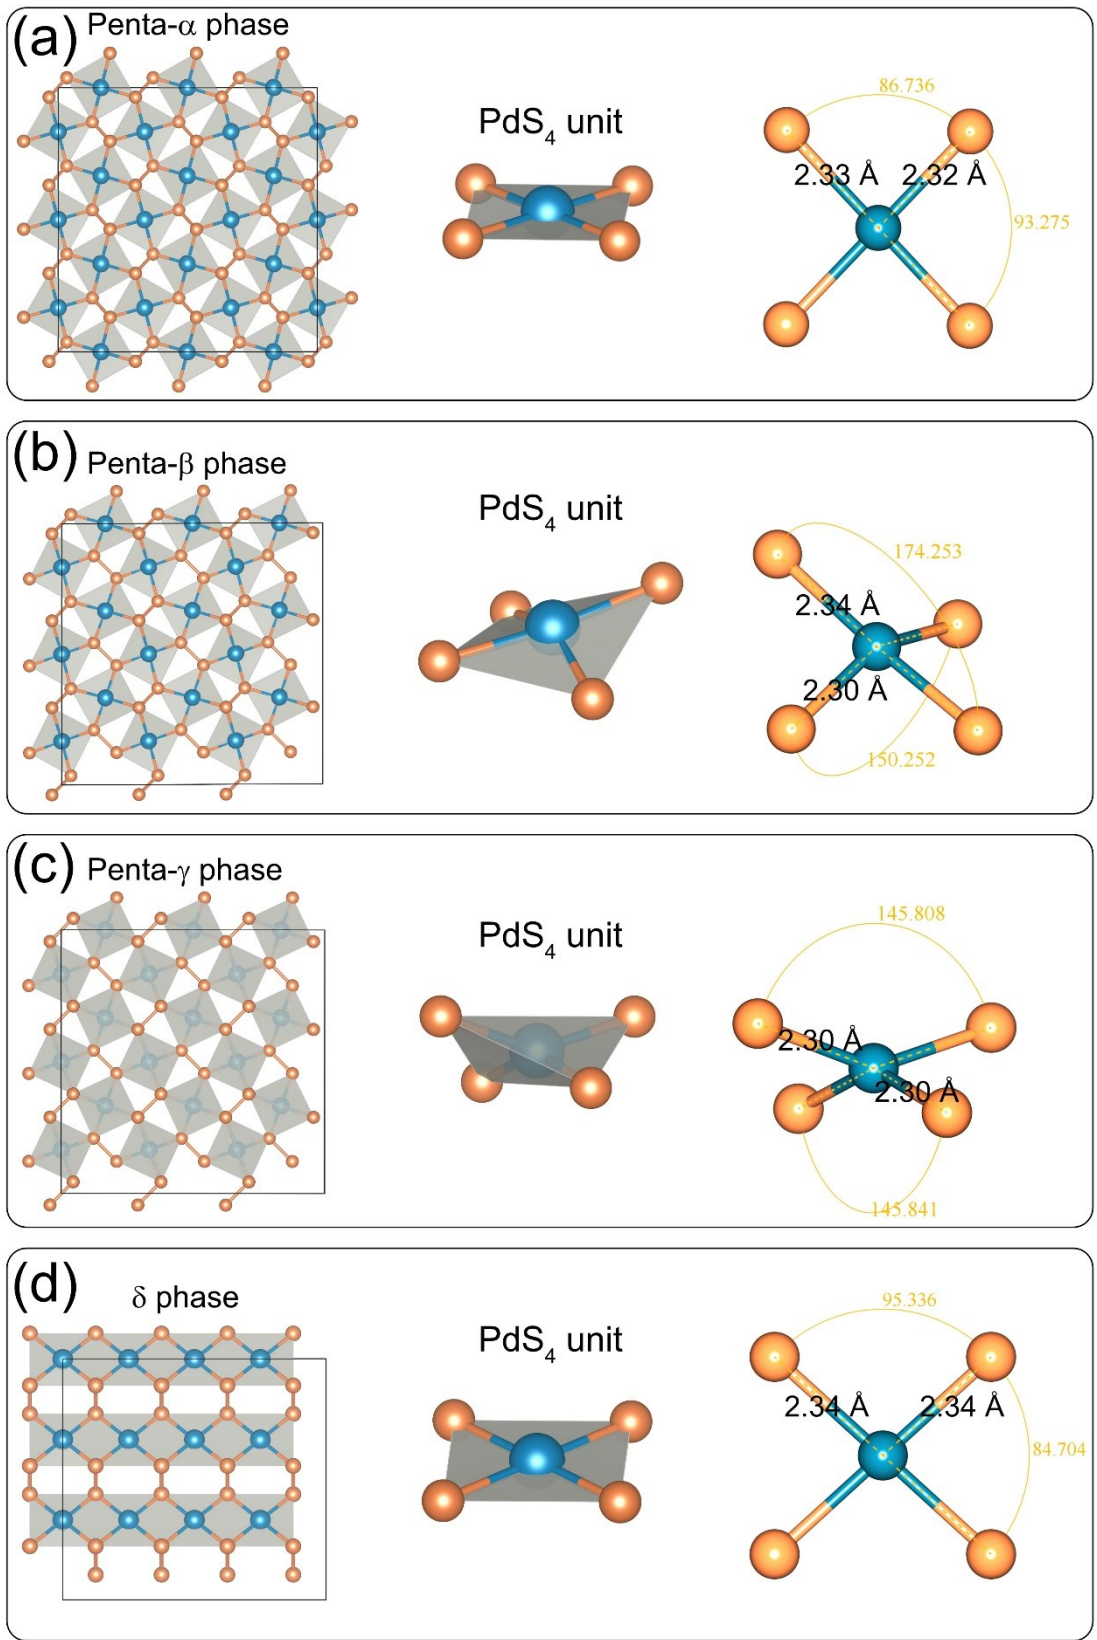

Figure s7. Top view of PdS<sub>2</sub> supercell in (a) penta- $\alpha$ , (b) penta- $\beta$ , (c) penta- $\gamma$  and (d)  $\delta$  phases with four kinds of PdS<sub>4</sub> units.
